# Supplementary material
Source: PubMed Central journal article supplement (PMC5693241)
Supplement: NIHMS830751-supplement-Supplement.pdf [file NIHMS830751-supplement-Supplement.pdf]

## Final Search Strategy

### SEARCH #1:

1. Emergencies
2. Emergency Service
3. Emergency Medicine
4. Accident and Emergency
5. ED OR AED OR PED OR emergency OR emergencies (**title and abstract**)
6. (Casualty OR Trauma OR Emergency) AND (ward\* OR department\* OR service\* OR unit\* OR medicine) (**title and abstract**)

### SEARCH #2:

7. Electronic Mail
8. Internet
9. Computers
10. Medical Informatics
11. Software
12. Telephone
13. Technology (**title and abstract**)
14. Kiosk (**title and abstract**)
15. Wireless OR mobile OR text messag\* OR messag\* OR sms OR short messaging service OR mhealth OR ehealth OR handheld OR laptop OR palmtop OR smartphone OR social net\* (**title and abstract**)

### COMBINED SEARCH

16. 1 OR 2 OR 3 OR 4 OR 5 OR 6
17. 7 OR 8 OR 9 OR 10 OR 11 OR 12 OR 13 OR 14 OR 15
18. 16 AND 17

### LIMITS:

1. Limit to human studies
2. Limit to English, Spanish and French language
3. Limit to 1990-present

("\*" denotes truncation character; i.e., retrieves all possible suffix variations of the root word)
